# Supplementary material for: Complex Modes of Inheritance in Hereditary Red Blood Cell Disorders: A Case Series Study of 155 Patients
Source: MDPI journal article supplement (doi:10.3390/genes12070958), 2021-06-23
Supplement: s1 [file s1]

## Supplementary Data

### Complex modes of inheritance in hereditary red blood cell disorders: a case series study of 155 patients

Immacolata Andolfo<sup>1,2,\*</sup>, Stefania Martone<sup>1,2</sup>, Barbara Eleni Rosato<sup>1,2</sup>, Roberta Marra<sup>1,2</sup>, Antonella Gambale<sup>2,3</sup>, Gianluca Forni<sup>4</sup>, Valeria Pinto<sup>4</sup>, Magnus Göransson<sup>5</sup>, Vasiliki Papadopoulou<sup>6</sup>, Mathilde Gavillet<sup>6</sup>, Mohssen Elalfy<sup>7</sup>, Antonella Panarelli<sup>2</sup>, Giovanna Tomaiuolo<sup>2,8</sup>, Achille Iolascon<sup>1,2</sup> and Roberta Russo<sup>1,2,\*</sup>

<sup>1</sup> Dipartimento di Medicina Molecolare e Biotecnologie Mediche, Università degli Studi di Napoli Federico II, Napoli, Italy

<sup>2</sup> CEINGE Biotecnologie Avanzate, Napoli, Italy

<sup>3</sup> Dipartimento Assistenziale di Medicina di Laboratorio (DAIMedLab), UOC Genetica Medica, AOU Federico II, Napoli, Italy

<sup>4</sup> Centro della Microcitemia e delle Anemie Congenite Ente Ospedaliero Ospedali Galliera, Via Volta 6, 16128 Genoa, Italy.

<sup>5</sup> Department of Pediatrics, The Queen Silvia Children's Hospital, Sahlgrenska University Hospital, Gothenburg, Sweden.

<sup>6</sup> Service and Central Laboratory of Hematology, Department of Oncology and Department of Laboratory Medicine and Pathology, Lausanne University Hospital (CHUV), Lausanne, Switzerland.

<sup>7</sup> Thalassemia Center, Faculty of Medicine, Ain Shams University, Cairo, Egypt.

<sup>8</sup> Dipartimento di Ingegneria Chimica, dei Materiali e della Produzione Industriale, Università di Napoli Federico II, Napoli, Italy

#### Supplemental Data file contains:

- Supplemental Figure S1
- Supplemental Figure S2
- Supplemental Figure S3
- Supplemental Table S1
- Supplemental Table S2

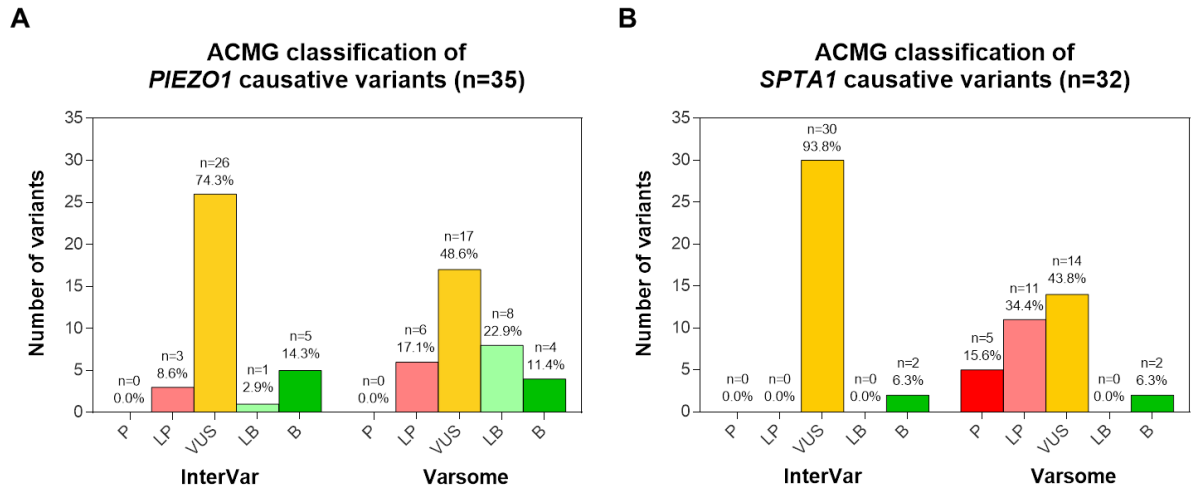

**Figure S1. Histogram chart showing the ACMG classification of the *PIEZO1* and *SPTA1* known causative variants.** The charts show the number of known causative variants of *PIEZO1* (**A**) and *SPTA1* (**B**) genes classified as P = pathogenic, LP = likely pathogenic, VUS = variants of unknown significance, LB = likely benign, B = benign by two web tools InterVar (<http://wintervar.wglab.org/>) and Varsome (<https://varsome.com/>). The two tools were used for clinical interpretation of the known causative variants of both the genes, following the American College of Medical Genetics and Genomics (ACMG) and the Association for Molecular Pathology (AMP) 2015 guidelines.

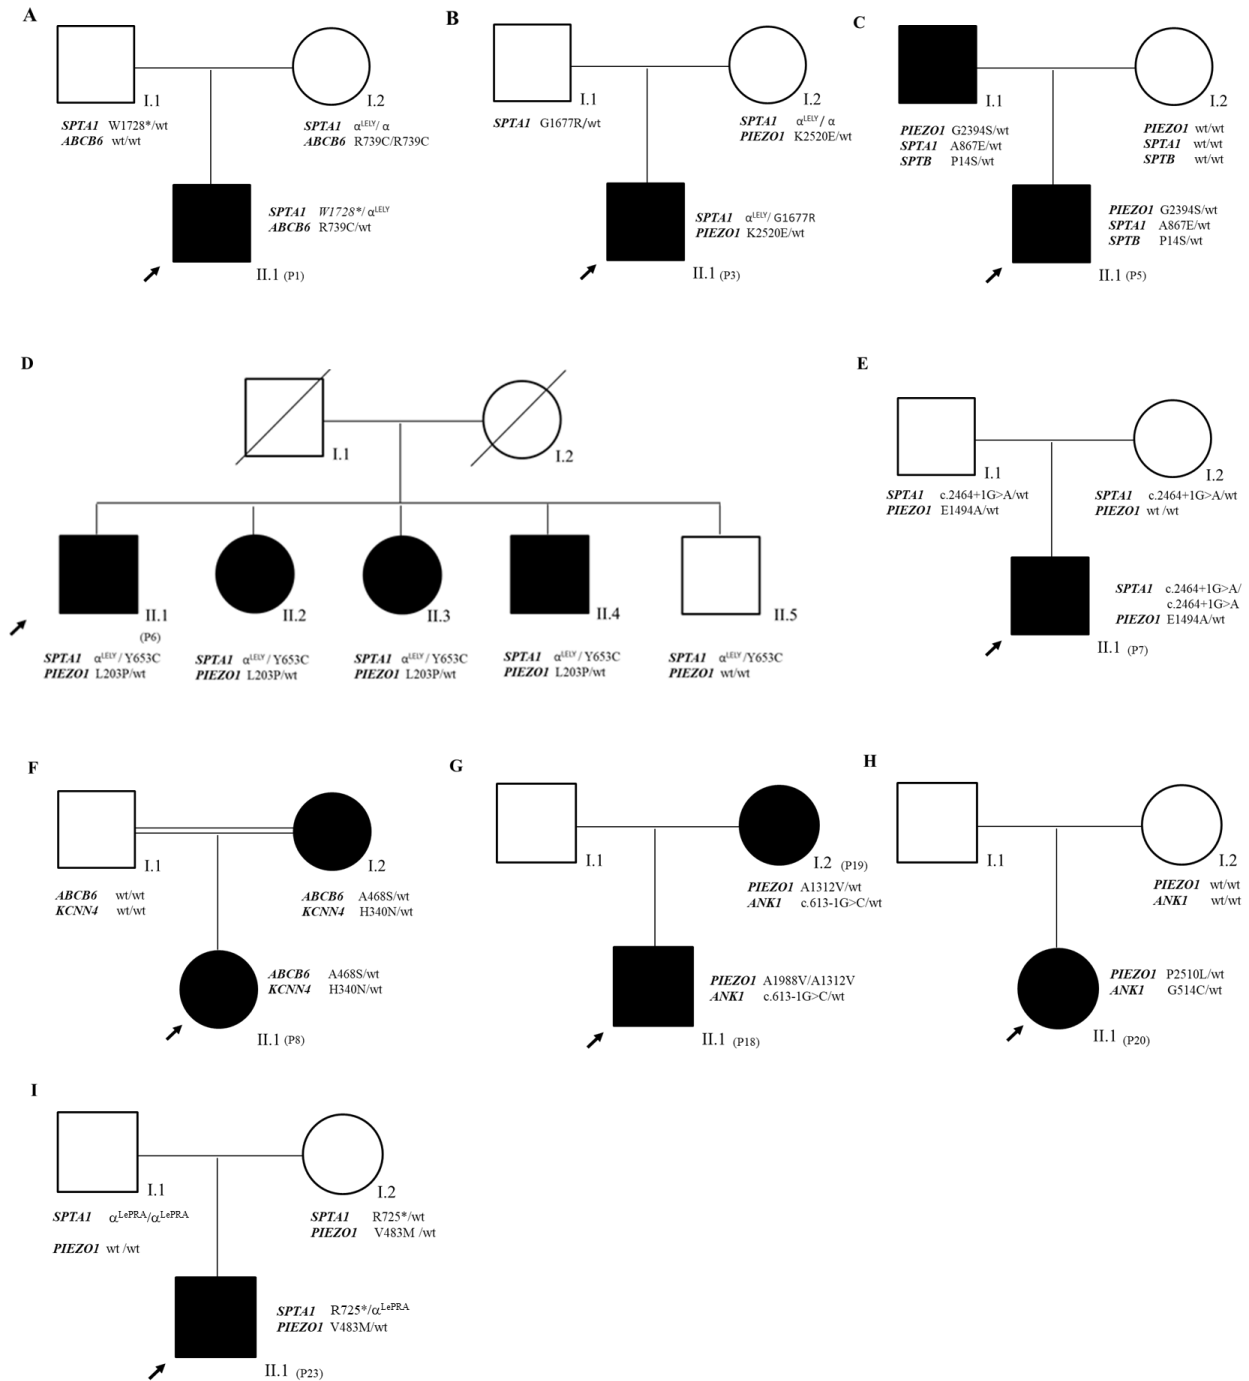

**Figure S2. Pedigree of nine probands with digenic inheritance.** Males are depicted by squares and females by circles. Black filled symbols indicate individuals with dual/multi-locus genotype. Arrows indicate the probands. Diagonal line indicates death of individual. Double lines between the parents indicate consanguineous marriage. Genotypes are indicated underneath each individual. Inheritance patterns according to the families of the following patients. (A) Proband P1. (B) Proband P3. (C) Proband P5. (D) Proband P6. The parents have not been analyzed. (E) Proband P7. (F) Proband P8. (G) Probands P18 and P19. The father has not been analyzed. (H) Proband P20. The father has not been analyzed. (I) Proband P23. SPTA1- $\alpha^{\text{LeLY}}$  (c.6531-12C>T, rs28525570); SPTA1- $\alpha^{\text{LePRA}}$  (c.4339-99C>T, rs200830867).

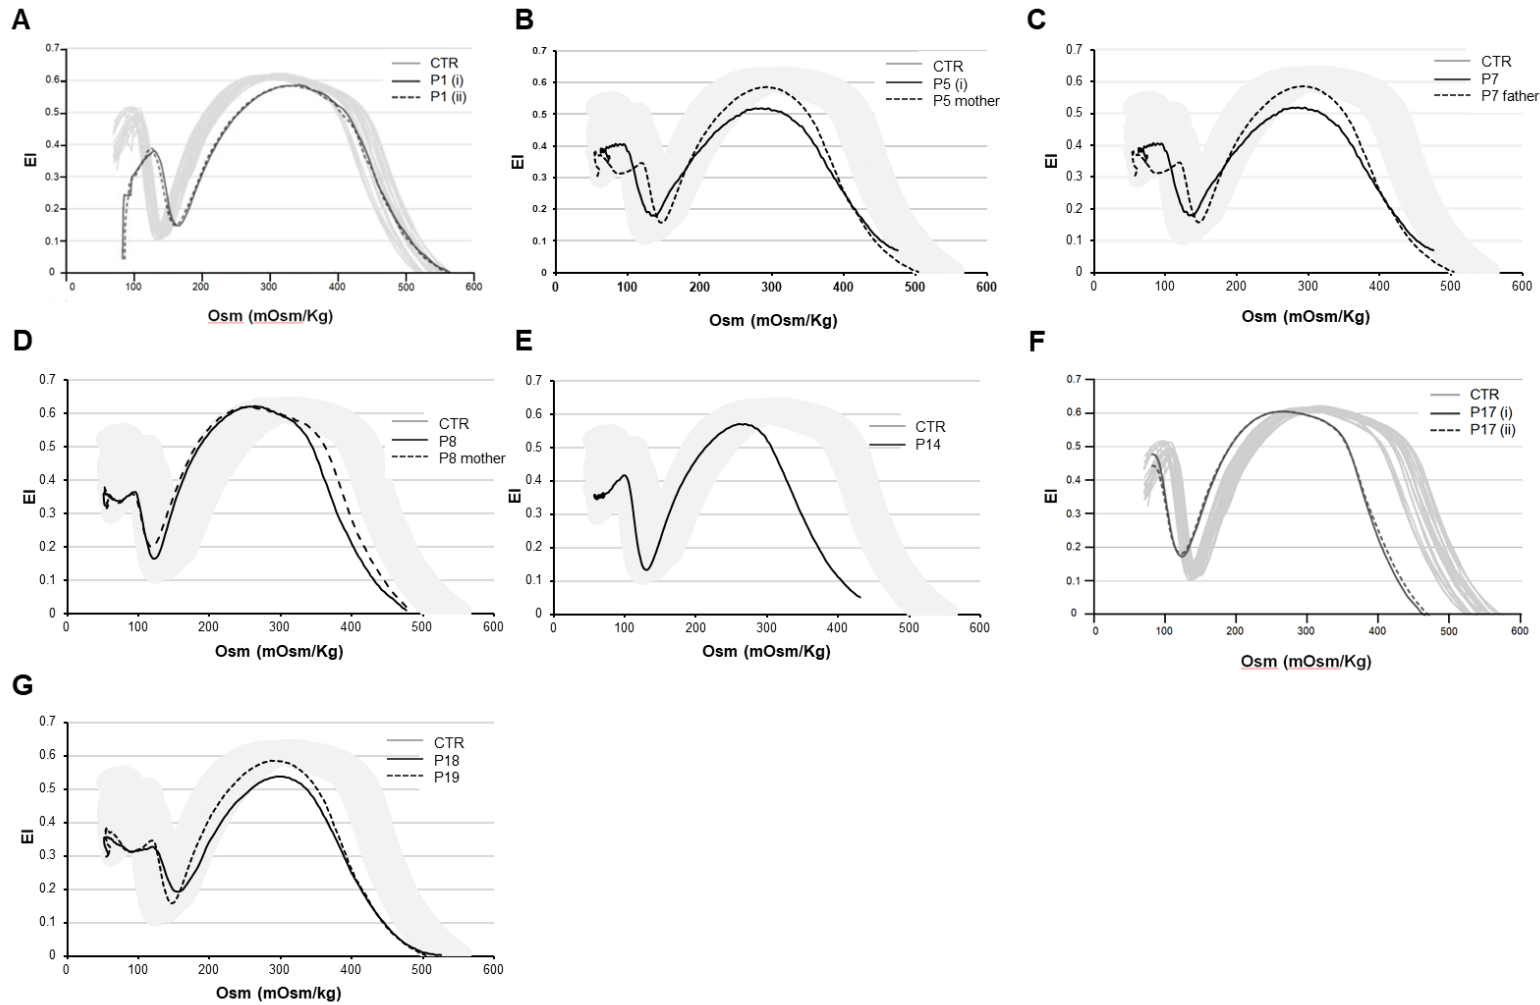

**Figure S3. Osmoscan profiles of some representative dual inheritance cases.** P1 patient (A), P5 family (B), P7 family (C), P8 family (D), P14 (E), P17 (F), P18 and P19 patients (G). Continuous lines, curves for the patients; dotted line, curves of parents; shaded areas, curves for the control (CTR) range.

**Supplemental Table S1. Additional evidence supporting variant reassessment**

| Gene          | HGVS nomenclature |               | Other pieces of evidence                                                                                                                                                                                                                                            |
|---------------|-------------------|---------------|---------------------------------------------------------------------------------------------------------------------------------------------------------------------------------------------------------------------------------------------------------------------|
|               | cDNA-level        | Protein-level |                                                                                                                                                                                                                                                                     |
| <i>ABCB6</i>  | c.1361T>C         | p.Val454Ala   | PS3 (for functional studies performed in Andolfo et al, 2016 PMID: 27151991)                                                                                                                                                                                        |
| <i>ABCB6</i>  | c.1402G>T         | p.Ala468Ser   | PP1 (for analysis of segregation in the affected family members)                                                                                                                                                                                                    |
| <i>ABCB6</i>  | c.1474G>A         | p.Ala492Thr   | PS3 (for functional studies performed in Fukuda et al 2016, PMID: 27507172, demonstration of impaired ATP binding).<br>BS2 was eliminated because FP is a condition found also in healthy subjects as for example blood donors (Andolfo et al, 2016 PMID: 27151991) |
| <i>ABCB6</i>  | c.1691T>C         | p.Met564Thr   | -                                                                                                                                                                                                                                                                   |
| <i>ABCB6</i>  | c.1762G>A         | p.Gly588Ser   | BS2 was eliminated because FP is a condition found also in healthy subjects as for example blood donors (Andolfo et al, 2016 PMID: 27151991). It is a well-known disease-associated polymorphism with additional supporting functional evidence.                    |
| <i>ABCB6</i>  | c.2215C>T         | p.Arg739Cys   | PS3 (for functional studies performed in this study, ionic flux assay, data not shown).                                                                                                                                                                             |
| <i>ANK1</i>   | c.613-1G>C        | -             | -                                                                                                                                                                                                                                                                   |
| <i>ANK1</i>   | c.1540G>T         | p.Gly514Cys   | -                                                                                                                                                                                                                                                                   |
| <i>G6PD</i>   | c.1360C>T         | p.Arg454Cys   | -                                                                                                                                                                                                                                                                   |
| <i>KCNN4</i>  | c.983A>G          | p.His328Arg   | PP3 (Multiple lines of computational evidence support a deleterious effect on the gene or gene product)                                                                                                                                                             |
| <i>KCNN4</i>  | c.1018C>A         | p.His340Asn   | PS4 (observed in 3 patients from 2 unrelated families)                                                                                                                                                                                                              |
| <i>LARS2</i>  | c.457A>C          | p.Asn153His   | PP3 (predicted to impair splicing).<br>PP2 (the gnomAD missense Z-Score= 1.33 is greater than 0.647).<br>PP5 (ClinVar classifies this variant as likely pathogenic)                                                                                                 |
| <i>PIEZO1</i> | c.608T>C          | p.Leu203Pro   | PP1 (Co-segregation with disease in four affected family members).                                                                                                                                                                                                  |

**Supplemental Table S1.** (continued)

|               |           |              |                                                                                                                                                                                                                                                                                                                                                                                                                                                                                                                                                                                                                             |
|---------------|-----------|--------------|-----------------------------------------------------------------------------------------------------------------------------------------------------------------------------------------------------------------------------------------------------------------------------------------------------------------------------------------------------------------------------------------------------------------------------------------------------------------------------------------------------------------------------------------------------------------------------------------------------------------------------|
| <i>PIEZO1</i> | c.1001C>T | p.Ala334Val  | PM7 (additional moderate pathogenic evidence, left shift of the osmolarity curve).<br>PM1 (Located in a well-established functional domain, transmembrane helical unit 2 (THU2) essential for plasma membrane targeting and inactivation kinetics, Yan Jiang et al 2021 PMID: 33610426).                                                                                                                                                                                                                                                                                                                                    |
| <i>PIEZO1</i> | c.1447G>A | p.Val483Met  | -                                                                                                                                                                                                                                                                                                                                                                                                                                                                                                                                                                                                                           |
| <i>PIEZO1</i> | c.1813A>G | p.Met605Val  | PM1 ( Located in a well-established functional domain, transmembrane helical unit 2 (THU4) essential for mechanosensitivity and Jedi1/2 responses (Yan Jiang et al 2021 PMID: 33610426).<br>PS4 (observed in 3 patients from 2 unrelated families of our DHS registry).                                                                                                                                                                                                                                                                                                                                                     |
| <i>PIEZO1</i> | c.3935C>T | p.Ala1312Val | PS4 (observed in 2 patients from 1 unrelated family of our DHS registry).<br>PM1 (Located in a well-established functional domain, Beam essential for mechanosensitivity; Yoda1, Jedi1/2 responses; inactivation kinetics; margoric acid-mediated inhibition (Yan Jiang et al 2021 PMID: 33610426).<br>PM7 (additional moderate pathogenic evidence, left shift of the osmolarity curve). PP1 (Co-segregation with disease in two affected family members).<br>BS2 was eliminated because DHS is a condition more frequent than expected (for example DHS variants are associated with malaria resistance, Ma et al, 2018). |
| <i>PIEZO1</i> | c.4481A>C | p.Glu1494Ala | PS4 (observed in 2 patients from 1 unrelated family of our DHS registry).<br>PM7 (additional moderate pathogenic evidence, left shift of the osmolarity curve).<br>PP1 (Co-segregation with disease in two affected family members).                                                                                                                                                                                                                                                                                                                                                                                        |
| <i>PIEZO1</i> | c.5195C>T | p.Thr1732Met | PM1 (Located in a well-established functional domain, THU8 PM targeting and Yoda1 responses, Yan Jiang et al 2021 PMID: 33610426).<br>PM7 (additional moderate pathogenic evidence, left shift of the osmolarity curve).<br>PP3 (Multiple lines of computational evidence support a deleterious effect on the gene or gene product).<br>BS2 was eliminated because DHS is a condition more frequent than expected (for example DHS variants are associated with malaria resistance, Ma et al, 2018).                                                                                                                        |
| <i>PIEZO1</i> | c.5835C>G | p.Phe1945Leu | PM1 (Located in a well-established functional domain, THU9 PM targeting and Yoda1 responses, Yan Jiang et al 2021 PMID: 33610426).<br>PM7 (additional moderate pathogenic evidence, left shift of the osmolarity curve).<br>PP3 (Multiple lines of computational evidence support a deleterious effect on the gene or gene product)                                                                                                                                                                                                                                                                                         |
| <i>PIEZO1</i> | c.5981C>G | p.Ser1994Cys | PM1 (Located in a well-established functional domain, THU9 PM targeting and Yoda1 responses, Yan Jiang et al 2021 PMID: 33610426).<br>PM5 (Novel missense change at an amino acid residue where a different missense change determined to be pathogenic has been seen before, CM1911799).<br>PP3 (Multiple lines of computational evidence support a deleterious effect on the gene or gene product).                                                                                                                                                                                                                       |

**Supplemental Table S1.** (continued)

|               |             |              |                                                                                                                                                                                                                                                                                                                                                                                                                              |
|---------------|-------------|--------------|------------------------------------------------------------------------------------------------------------------------------------------------------------------------------------------------------------------------------------------------------------------------------------------------------------------------------------------------------------------------------------------------------------------------------|
| <i>PIEZO1</i> | c.6205G>A   | p.Val2069Met | PM1 (Located in a well-established functional domain, THU9 PM targeting and Yoda1 responses, Yan Jiang et al 2021 PMID: 33610426).<br>PM7 (additional moderate pathogenic evidence, left shift of the osmolarity curve).<br>PP3 (Multiple lines of computational evidence support a deleterious effect on the gene or gene product).                                                                                         |
| <i>PIEZO1</i> | c.6796G>A   | p.Val2266Ile | PS4 (observed in 3 patients from 2 unrelated families of our DHS registry).<br>PP1 (Co-segregation with disease in two affected family members).<br>PP3 (Multiple lines of computational evidence support a deleterious effect on the gene or gene product).<br>BS2 was eliminated because DHS is a condition more frequent than expected (for example DHS variants are associated with malaria resistance, Ma et al, 2018). |
| <i>PIEZO1</i> | c.7180G>A   | p.Gly2394Ser | PS4 (observed in 2 patients from 2 unrelated families of our DHS registry).<br>PM7 (additional moderate pathogenic evidence, left shift of the osmolarity curve).<br>BS2 was eliminated because DHS is a condition more frequent than expected (for example DHS variants are associated with malaria resistance, Ma et al, 2018).                                                                                            |
| <i>PIEZO1</i> | c.7219G>C   | p.Glu2407Gln | PS4 (observed in 5 patients from 3 unrelated families of our DHS registry).<br>PM7 (additional moderate pathogenic evidence, left shift of the osmolarity curve).<br>PP1 (Co-segregation with disease in two affected family members)                                                                                                                                                                                        |
| <i>PIEZO1</i> | c.7367G>A   | p.Arg2456His | PS3 (for functional studies performed in Andolfo et al, 2013 PMID: 23479567 and in several other studies).                                                                                                                                                                                                                                                                                                                   |
| <i>PIEZO1</i> | c.7529C>T   | p.Pro2510Leu | PS4 (observed in 4 patients from 4 unrelated families of our DHS registry).<br>PM7 (additional moderate pathogenic evidence, left shift of the osmolarity curve).<br>BS2 was eliminated because DHS is a condition more frequent than expected (for example DHS variants are associated with malaria resistance, Ma et al, 2018).                                                                                            |
| <i>PIEZO1</i> | c.7558A>G   | p.Lys2520Glu | PS4 (observed in 3 patients from 2 unrelated families of our DHS registry).<br>PM1 (Located in a well-established functional domain, CTD Ion permeation and gating; RR sensitivity).<br>PP1 (Co-segregation with disease in two affected family members).<br>BS2 was eliminated because DHS is a condition more frequent than expected (for example DHS variants are associated with malaria resistance, Ma et al, 2018).    |
| <i>PKLR</i>   | c.1675C>T   | p.Arg559*    | -                                                                                                                                                                                                                                                                                                                                                                                                                            |
| <i>SEC23B</i> | c.1233+4C>T | -            | -                                                                                                                                                                                                                                                                                                                                                                                                                            |
| <i>SLC4A1</i> | c.1462G>A   | p.Val488Met  | -                                                                                                                                                                                                                                                                                                                                                                                                                            |
| <i>SLC4A1</i> | c.2608C>T   | p.Arg870Trp  | PS3 (for functional studies performed in Jarolim et al 1995 PMID: 7530501)                                                                                                                                                                                                                                                                                                                                                   |

**Supplemental Table S1.** (continued)

|               |                 |              |                                                                                                                                                                                                                                                                                                                                                                                    |
|---------------|-----------------|--------------|------------------------------------------------------------------------------------------------------------------------------------------------------------------------------------------------------------------------------------------------------------------------------------------------------------------------------------------------------------------------------------|
| <i>SLC4A1</i> | c.2621T>C       | p.Leu874Pro  | PM1 (Located in a well-established functional domain that is responsible of the interaction with carbon anhydrase II, Annelies van Vuren et al 2019 PMID: 31723846)                                                                                                                                                                                                                |
| <i>SPTA1</i>  | c.460_462dupTTG | p.Leu155dup  | PS3 (for functional studies performed in Roux et al 1989. PMID: 2567189; Glele-Kakai et al 1996 PMID: 8857939; Risinger et al 2018 PMID: 30393954).<br>PM1 (Located in a well-established functional domain, self-association domain).                                                                                                                                             |
| <i>SPTA1</i>  | c.1958A>G       | p.Tyr653Cys  | PS1 (Same amino acid change as a previously established pathogenic variant regardless of nucleotide change, van Vuren et al 2019 PMID: 31723846).<br>PP1 (Co-segregation with disease in four affected family members). BS2 was eliminated because HS is a frequent condition.                                                                                                     |
| <i>SPTA1</i>  | c.2173C>T       | p.Arg725*    | -                                                                                                                                                                                                                                                                                                                                                                                  |
| <i>SPTA1</i>  | c.2464+1G>A     | -            | -                                                                                                                                                                                                                                                                                                                                                                                  |
| <i>SPTA1</i>  | c.4708G>A       | p.Ala1570Thr | -                                                                                                                                                                                                                                                                                                                                                                                  |
| <i>SPTA1</i>  | c.5029G>A       | p.Gly1677Arg | PM7 (additional moderate pathogenic evidence, positive EMA test).<br>PP1 (Co-segregation with disease in two affected family members).<br>PP3 (Multiple lines of computational evidence support a deleterious effect on the gene or gene product).                                                                                                                                 |
| <i>SPTA1</i>  | c.5183G>A       | p.Trp1728*   | -                                                                                                                                                                                                                                                                                                                                                                                  |
| <i>SPTB</i>   | c.40C>T         | p.Pro14Ser   | PM7 (additional moderate pathogenic evidence, decreased DiMax of osmolarity curve).<br>PP1 (Co-segregation with disease in two affected family members).<br>BS2 was eliminated because HS is a frequent condition.                                                                                                                                                                 |
| <i>SPTB</i>   | c.871G>A        | p.Gly291Ser  | PM1 (Located in a well-established functional domain that is responsible of the interaction with protein 4.1R, actin and adducin).<br>PM2 (Absent from controls).<br>PP2 (Missense variant in a gene that has a low rate of benign missense variation and in which missense variants are a common mechanism of disease. The gnomAD missense Z-Score= 0.751 is greater than 0.647). |
| <i>SPTB</i>   | c.1606G>A       | p.Asp536Asn  | PS3 (or functional studies performed in Russo R et al 2018 PMID: 29396846).                                                                                                                                                                                                                                                                                                        |

NCBI RefSeq transcript for each gene:

ABCB6, NM\_005689; ANK1, NM\_000037; G6PD, NM\_001042351; KCNN4, NM\_002250; LARS2, NM\_015340; PIEZO1, NM\_001142864; PKLR, NM\_000298; SEC23B, NM\_006363; SLC4A1, NM\_000342; SPTA1, NM\_003126; SPTB, NM\_001355437.



**Supplemental Table S2. Clinical characteristics of the patients with multi-locus inheritance.**

| Patient ID | Gender | Ethnicity | †Age (years) | RBCs (×10 <sup>6</sup> /μL) | Hb (g/dL) | Ht (%) | MCV (fL) | MCH (pg) | MCHC (g/dL) | ARC (×10 <sup>3</sup> /μL) | Tb (mg/dL) | LDH (U/L) | Ferritin (ng/mL) | Number of transfusions | Additional features                                                                                   |
|------------|--------|-----------|--------------|-----------------------------|-----------|--------|----------|----------|-------------|----------------------------|------------|-----------|------------------|------------------------|-------------------------------------------------------------------------------------------------------|
| P1         | m      | Swiss     | 36           | 2.50                        | 7.8       | 23     | 93.0     | 31.0     | 34          | 188                        | -          | -         | -                | 1                      | Splenomegaly                                                                                          |
| P2         | m      | Egyptian  | 6            | 2.95                        | 8.5       | 27     | 90.5     | 28.8     | 31.8        | 6                          | 0.5        | 210       | 1031             | 12                     | Consanguineous parents                                                                                |
| P3         | m      | Italian   | 3            | 3.29                        | 9.5       | 27     | 81.4     | 28.9     | 35.5        | 141                        | 3.9        | 1012      | 1239             | 20                     | Splenomegaly                                                                                          |
| P4         | f      | Italian   | 1            | 3.39                        | 12.1      | 36     | 104.7    | 35.7     | 34.1        | -                          | -          | -         | -                | 14*                    | Fetal ascites                                                                                         |
| P5         | m      | Italian   | 8            | 3.69                        | 10.1      | 29     | 77.8     | 27.4     | 35.3        | 502                        | 3.6        | -         | 113              | 1                      | Splenomegaly; jejunal atresia                                                                         |
| P6         | m      | Italian   | 68           | 4.90                        | 9.0       | 28.8   | 58.1     | 18.1     | 31.3        | 694                        | 0.8        | 281       | 747              | 17                     | Treated with iron chelators                                                                           |
| P7         | m      | Somali    | 11           | -                           | 10.8      | -      | 80.0     | 30.0     | 38.1        | 14                         | 5.4        | -         | 2000             | 150                    | Consanguineous parents; hearing impairment; speech delay; treated with iron chelators; splenectomized |
| P8         | f      | Swedish   | 3            | 4.90                        | 13.1      | 39     | 80.0     | 27.0     | 33.8        | 91                         | 3.5        | -         | 37               | 3*                     | Consanguineous parents; fetal ascites; deafness; psychomotor development impairment                   |
| P9         | f      | Italian   | 37           | 3.08                        | 10.9      | 31     | 100.0    | 35.4     | 35.5        | -                          | -          | -         | 511              | 0                      | Splenomegaly                                                                                          |
| P10        | m      | Turkish   | 5            | 3.20                        | 8.0       | 26     | 81.0     | 27.0     | 33.0        | 17                         | 2.0        | 710       | 4490             | 50                     | Splenomegaly; treated with iron chelators                                                             |
| P11        | m      | Italian   | 42           | 4.82                        | 12.3      | 39     | 80.9     | 25.5     | 31.5        | 111                        | 1.8        | 806       | 76.8             | 1                      | Splenomegaly                                                                                          |
| P12        | m      | Italian   | 42           | 3.88                        | 9.4       | 30     | 77.8     | 24.2     | 31.1        | 225                        | 1.6        | 1361      | 10.8             | 0                      | Splenectomized                                                                                        |
| P13        | m      | Italian   | 19           | 5.79                        | 17.9      | 54     | 94.0     | 31.0     | 33.0        | -                          | -          | -         | 838.2            | 0                      | Family history of erythrocytosis; hypopigmented macule on the right arm                               |
| P14        | m      | Italian   | 19           | 4.50                        | 13.2      | 39     | 86.2     | 29.3     | 34.0        | 140                        | 4.6        | 378       | 165              | -                      | -                                                                                                     |
| P15        | m      | Italian   | 34           | 4.16                        | 12.4      | 35     | 84.1     | 29.8     | 35.4        | 179                        | 3.6        | -         | -                | -                      | -                                                                                                     |
| P16        | m      | Italian   | 5            | 4.91                        | 11.0      | -      | 72.9     | 22.1     | 30.6        | -                          | 0.4        | 260       | 18               | 0                      | -                                                                                                     |
| P17        | m      | Swiss     | 18           | 5.00                        | 16.2      | 46     | 92.0     | 32.0     | 34.9        | 193                        | 9.4        | 143       | 115              | 0                      | Gilbert syndrome; lusoria arteria                                                                     |
| P18        | m      | Italian   | 18           | 5.08                        | 15.1      | 42     | 81.9     | 29.7     | 36.3        | 148                        | 0.75       | -         | 62.90            | 1                      | Splenectomized                                                                                        |
| P19        | f      | Italian   | 51           | 4                           | 10.4      | 30.5   | 76.0     | 25.9     | 34.1        | 75                         | 0.92       | -         | 140              | 0                      | Splenectomized                                                                                        |

**Supplemental Table S2** (continued).

| Patient ID | Gender | Ethnicity | †Age (years) | RBCs (×10 <sup>6</sup> /μL) | Hb (g/dL) | Ht (%) | MCV (fL) | MCH (pg) | MCHC (g/dL) | ARC (×10 <sup>3</sup> /μL) | Tb (mg/dL) | LDH (U/L) | Ferritin (ng/mL) | Number of transfusions | Additional features            |
|------------|--------|-----------|--------------|-----------------------------|-----------|--------|----------|----------|-------------|----------------------------|------------|-----------|------------------|------------------------|--------------------------------|
| P20        | f      | Italian   | 5            | 3.31                        | 7.4       | 21     | 87.0     | 22.3     | 35.4        | 415                        | 7.1        | 657       | 500              | 23                     | Gilbert syndrome; splenomegaly |

RBC, red blood cells; Hb, hemoglobin; Ht, hematocrit; MCV, mean corpuscular volume; MCH, mean corpuscular hemoglobin; MCHC, mean corpuscular hemoglobin concentration; ARC, absolute reticulocyte count; Tb, total bilirubin; LDH lactate dehydrogenase.

\*Intrauterine transfusion, fetal anemia.

†Age at diagnosis;

- data not available
